# Supplementary material for: Unraveling the origin of the “Turn-On” effect of Al-MIL-53-NO2 during H2S detection
Source: Royal Society of Chemistry journal article supplement (doi:10.1039/c9ce01595g), 2019-11-20
Supplement: c9ce01595g1.pdf [file c9ce01595g1.pdf]

# Unraveling the Origin of “Turn-On” Effect of Al-MIL-53-NO<sub>2</sub> During H<sub>2</sub>S Detection

*Zan Zhu, Xiang He, and Wei-Ning Wang\**

Department of Mechanical and Nuclear Engineering, Virginia Commonwealth

University, Richmond, Virginia 23219, USA

\* Corresponding Author

E-mail: [wnwang@vcu.edu](mailto:wnwang@vcu.edu)

Tel: 1-804-827-4306, 7030 (fax)

## S1. BET Surface Area Calculation

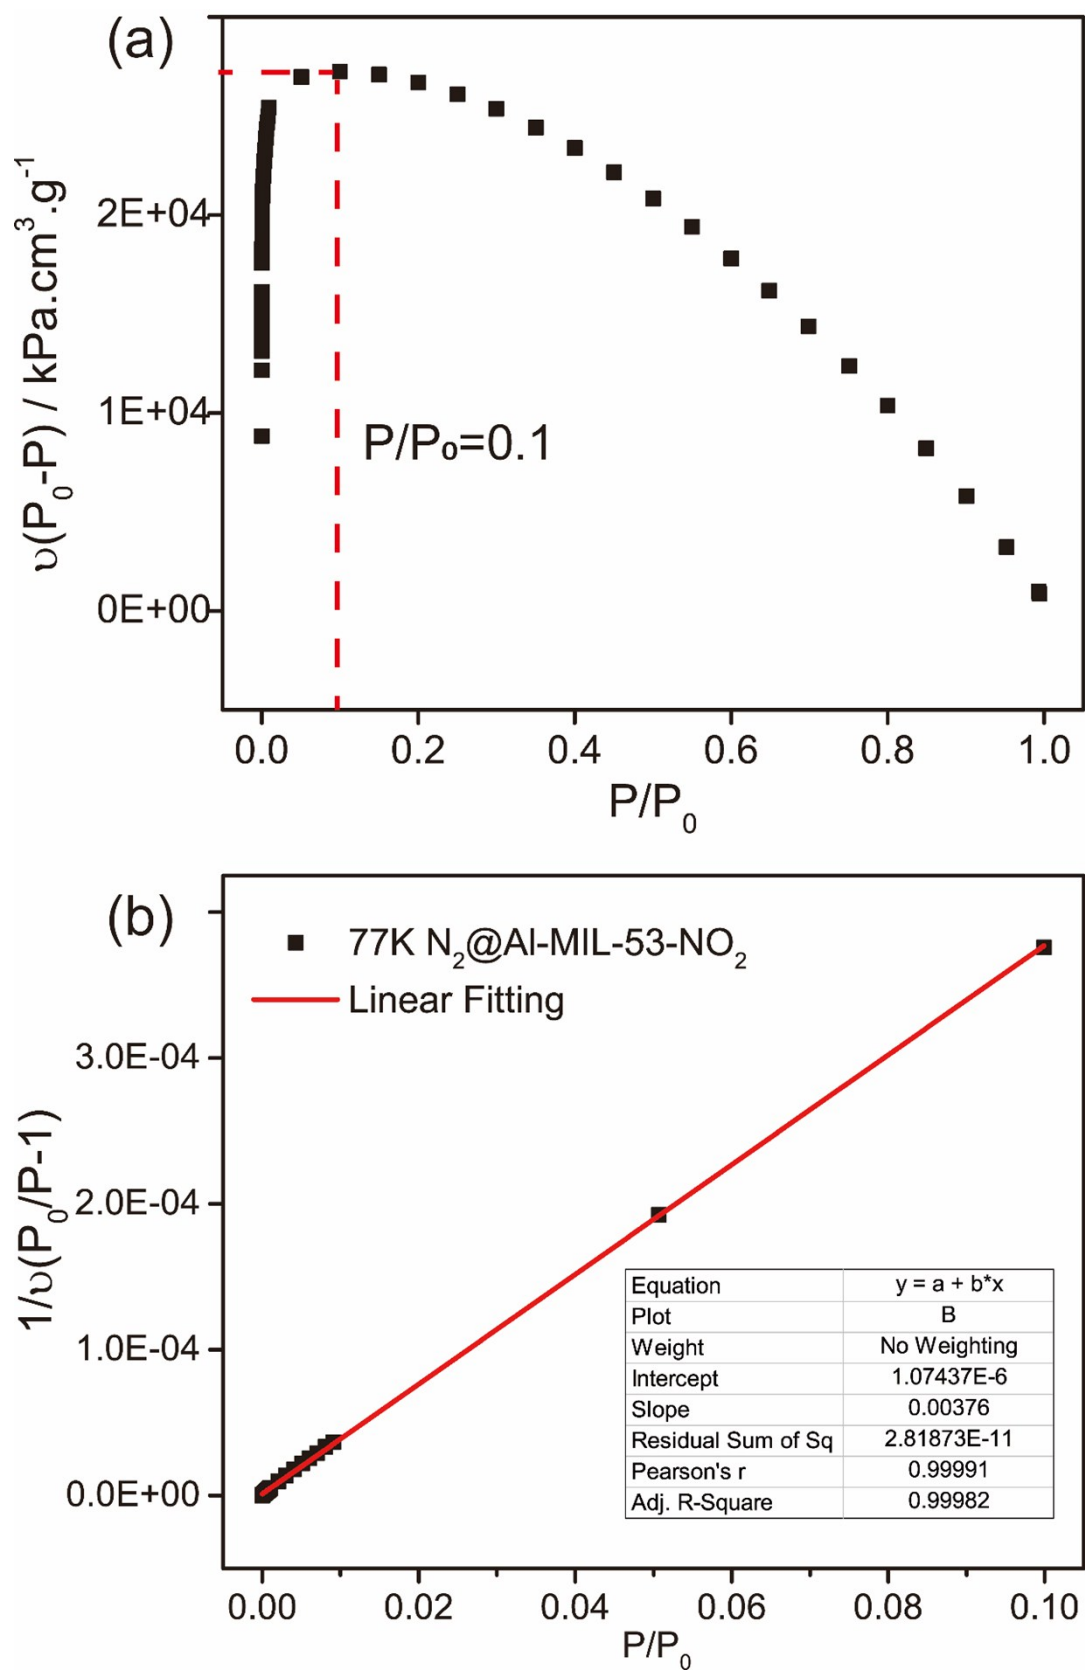Fig.S1 The consistency plot (a) and BET surface area plot (b) of Al-MIL-53-NO<sub>2</sub>.

BET analysis is usually performed during the range of  $0.05 < P/P_0 < 0.3$  for typical mesoporous materials. As for the microporous MOFs, BET theory can be also applied if the following criteria are satisfied.<sup>1-4</sup> (a) The pressure range should have values of  $v(P_0 - P)$  increasing with  $P/P_0$ ; (b) The  $y$ -intercept of the linear region must be positive to give a meaningful value of BET constant  $C$ ; (c) The BET monolayer capacity calculated from the linear fit corresponds to certain relative pressure  $(\frac{P}{P_0})_{v_m}$ , which must be located within the linear region chosen for the area calculation. Specifically, the BET surface area is calculated by the equation as follows,

$$S_{BET} = \frac{v_m}{M_v} \sigma_0 N_A$$

where  $v_m$  is the monolayer capacity, which could be obtained by the slope ( $[C-1]/v_m C$ ) and  $y$ -intercept ( $1/v_m C$ ) ( $v_m = \frac{1}{slope + intercept}$ );  $M_v$  is the molar volume for nitrogen ( $22414 \text{ cm}^3$ );  $\sigma_0$  is the cross-sectional area of adsorbate ( $0.162 \times 10^{-18} \text{ m}^2$  for nitrogen);  $N_A$  is the Avogadro constant ( $6.023 \times 10^{23}$ ). Therefore, the BET surface area in this work is calculated as shown below.

$$S_{BET} = 1/(1.07437 \times 10^{-6} + 0.00376)/22414 \times 6.023 \times 10^{23} \times 0.162 \times 10^{-18} = 1157 \text{ m}^2 \text{ g}^{-1};$$

$$\text{BET constant } C = 1 + 0.00376/1.07437 \times 10^{-6} = 3501;$$

$$\left(\frac{P}{P_0}\right)_{v_m} = \frac{1}{\sqrt{C} + 1} = 0.0166 \quad (0 < 0.0166 < 0.1)$$

## S2. Calculation of LOD

The limit of detection (LOD) is calculated according to the following formula:

$$LOD = \frac{3\sigma}{S}$$

where  $\sigma$  is the standard deviation; S is the slope for the suspension and supernatant. <sup>5</sup>

To calculate the LODs of the suspension and supernatant, 0.0015 g Al-MIL-53-NO<sub>2</sub> was treated by various concentrations of H<sub>2</sub>S (0.0-0.7 mM). The emission spectra of suspension and supernatant were recorded. By plotting the fluorescence intensity with H<sub>2</sub>S concentration (0.0-0.7 mM), the slope for suspension and supernatant were found to be  $3.75 \times 10^5 \text{ mM}^{-1}$  and  $2.07 \times 10^6 \text{ mM}^{-1}$ , respectively.

The standard deviation was calculated based on the following equation:

$$\sigma = \sqrt{\frac{\sum (F_i - \bar{F})^2}{N - 1}}$$

where  $F_i$  is the  $i^{\text{th}}$  value of fluorescence intensity at 450 nm of suspension/supernatant treated with H<sub>2</sub>S from 0.0 mM ( $i = 1$ ) to 0.7 mM ( $i = 8$ );  $\bar{F}$  is the average value of these obtained fluorescence intensities; N is the number of data points (N=8). The calculated standard deviations are shown below.

$$\sigma_{\text{suspension}} = 86633$$

$$\sigma_{\text{supernatant}} = 481016$$

The LODs of suspension and supernatant are thus calculated:

$$LOD_{\text{suspension}} = 69.3 \mu\text{M}$$

$$LOD_{\text{supernatant}} = 69.7 \mu\text{M}$$

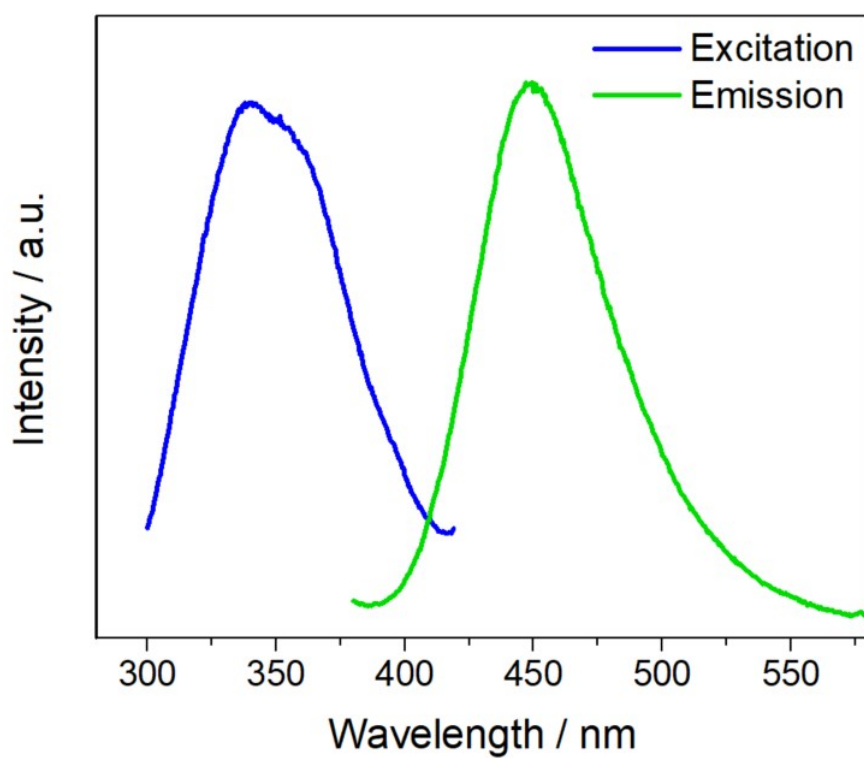

**Fig.S2** Excitation (blue line) and emission (green line) spectra of Al-MIL-53-NO<sub>2</sub> upon 1.0 mM H<sub>2</sub>S treatment.

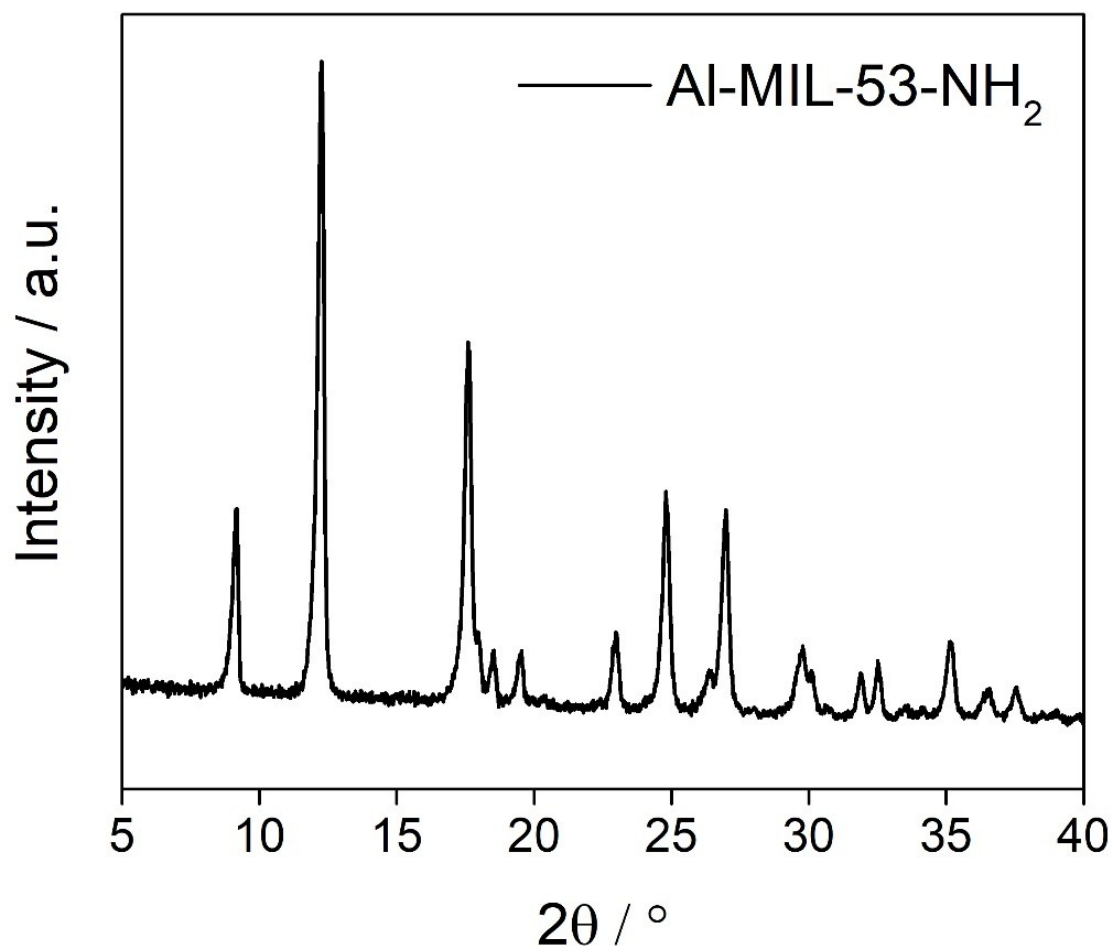

**Fig. S3** PXRD pattern of Al-MIL-53-NH<sub>2</sub>. The pattern matches well with the previous reference.<sup>6</sup>

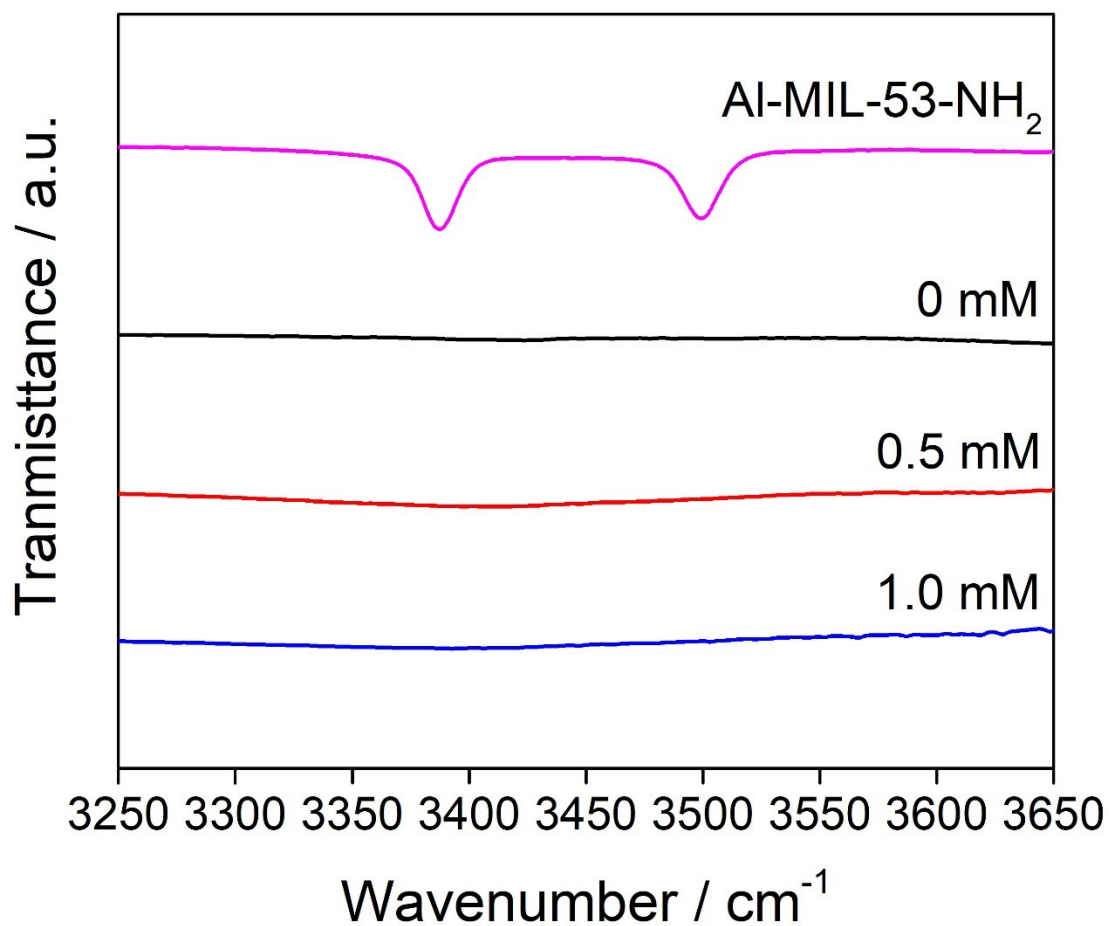

**Fig. S4** FT-IR spectra of Al-MIL-53-NH<sub>2</sub> and undissolved Al-MIL-53-NO<sub>2</sub> nanoparticles recollectd from 0.0 mM, 0.5 mM, and 1.0 mM NaHS solutions.

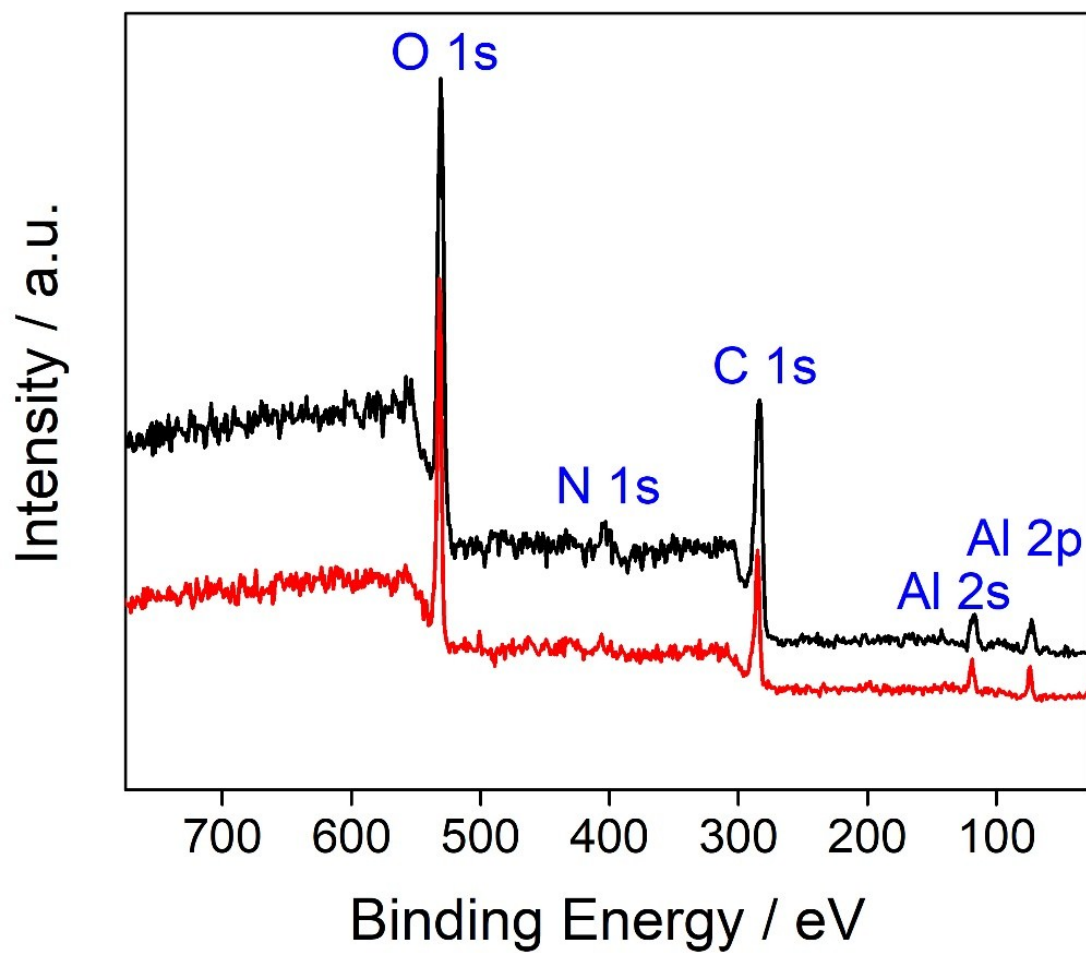

**Fig. S5** XPS spectra of Al-MIL-53-NO<sub>2</sub> before (black line) 1.0 mM H<sub>2</sub>S treatment and after (red line) 1.0 mM H<sub>2</sub>S treatment.



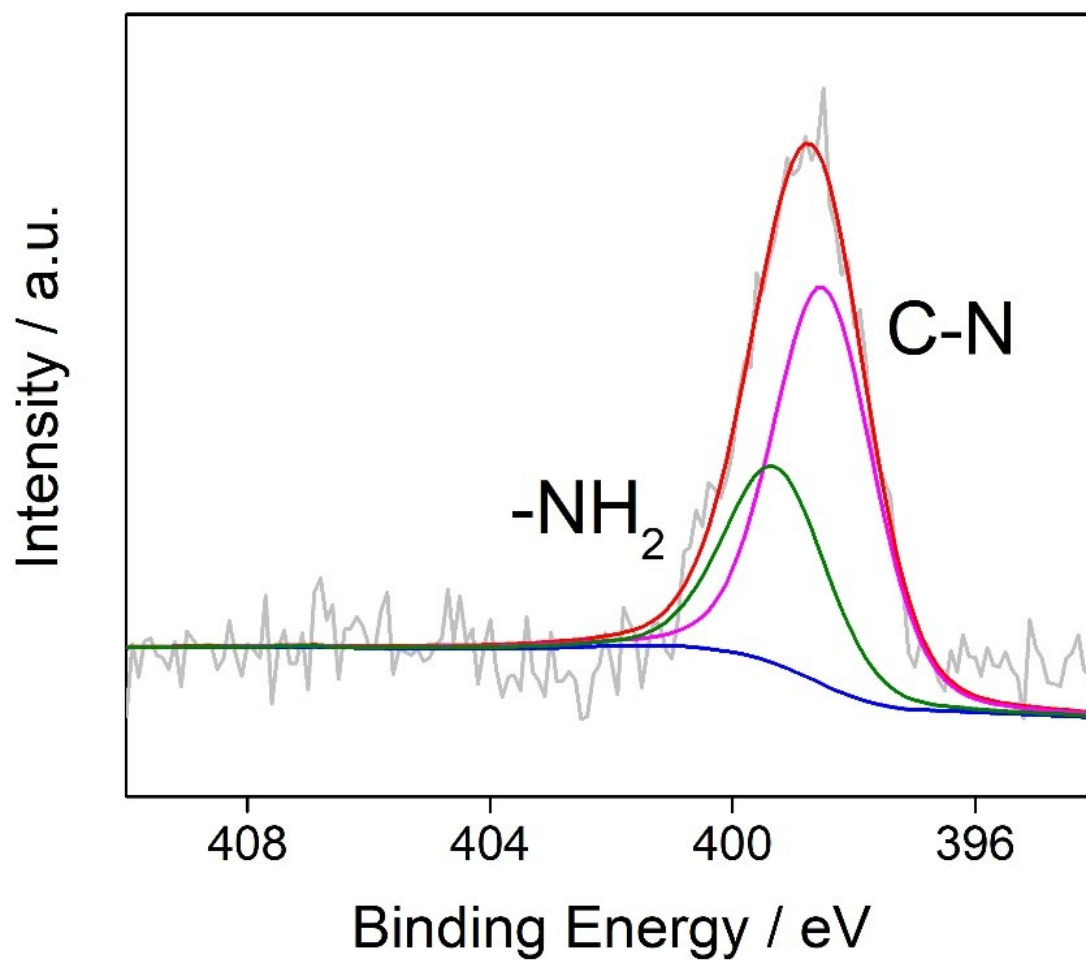

**Fig S6.** High-resolution XPS spectra of N 1s of as-synthesized Al-MIL-53-NH<sub>2</sub>.

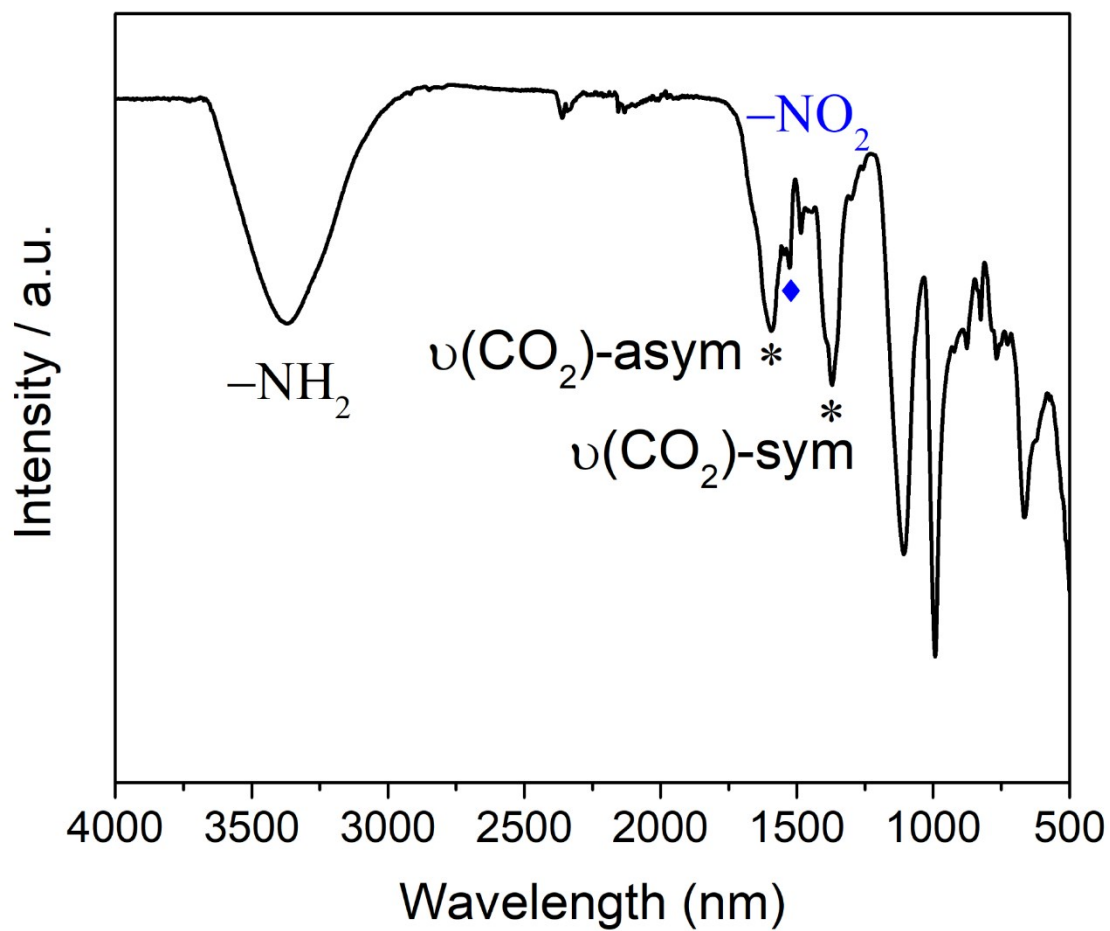

**Fig. S7** FT-IR spectrum of extracts evaporated from Al-MIL-53-NO<sub>2</sub> supernatant with 1.0 mM NaHS.

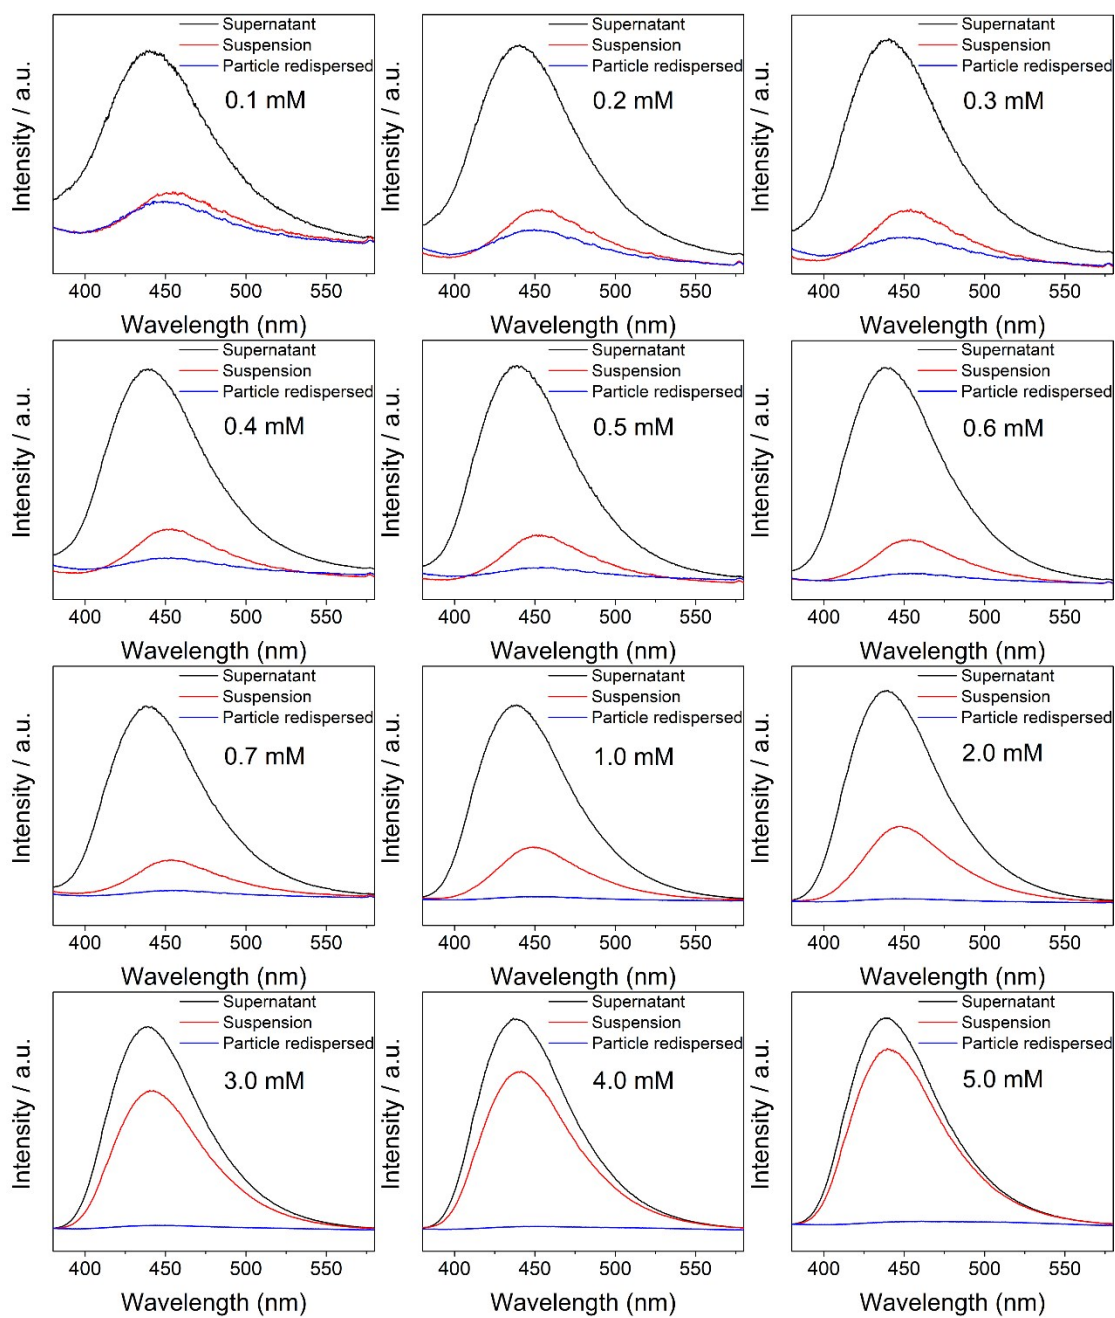

**Fig S8.** Emission spectra of supernatant, initial suspension, and particles recollected from the suspension of Al-MIL-53-NO<sub>2</sub> treated upon various concentration H<sub>2</sub>S.

**References:**

1. K. S. Walton and R. Q. Snurr, *Journal of the American Chemical Society*, 2007, **129**, 8552-8556.
2. X. He and W.-N. Wang, *Dalton Transactions*, 2019, **48**, 1006-1016.
3. T. Xu, Z. Jiang, M. He, X. Gao and Y. He, *CrystEngComm*, 2019, **21**, 4820-4827.
4. S. Li, J. Wu, X. Gao, M. He, Y. Wang, X. Wang and Y. He, *CrystEngComm*, 2018, **20**, 7178-7183.
5. Y.-Y. Cao, X.-F. Guo and H. Wang, *Sensors and Actuators B: Chemical*, 2017, **243**, 8-13.
6. D. Zhang, Y. Guan, E. J. M. Hensen, T. Xue and Y. Wang, *Catalysis Science & Technology*, 2014, **4**, 795-802.
